# Supplementary material for: Intra-articular osteoid osteoma as a differential diagnosis of diffuse mono-articular joint pain
Source: Springer Nature journal article supplement (doi:10.1186/s12891-016-1313-3), 2016-11-04

# Supplemental Figure

T1 TSE coronal

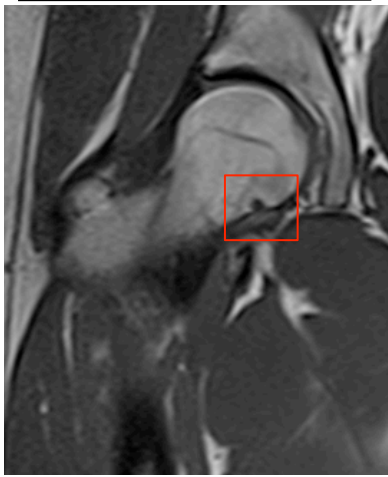

T1 FS TSE + GE  
coronal

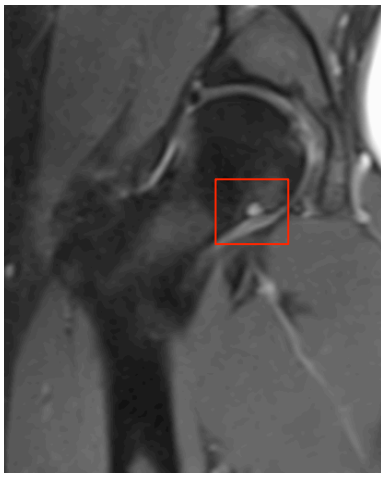

T2 FS TSE coronal

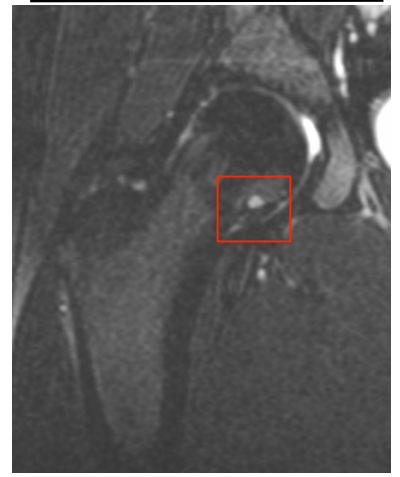

Supplement: MOESM1 [file 11019844]
